# Supplementary material for: EUCANEXT: an integrated database for the exploration of genomic and transcriptomic data from Eucalyptus species
Source: Oxford University Press journal article supplement (doi:10.1093/database/bax079), 2017-01-01
Supplement: bax079_additionalfile1.pdf [file bax079_additionalfile1.pdf]

| EST Sequences |                         |                    |                   |                 |                   |                     |
|---------------|-------------------------|--------------------|-------------------|-----------------|-------------------|---------------------|
| Tissue        | <i>E. camaldulensis</i> | <i>E. globulus</i> | <i>E. grandis</i> | <i>E. gunni</i> | <i>E. pellita</i> | <i>E. urophylla</i> |
| Apex          | -                       | 1,336              | -                 | -               | -                 | -                   |
| Leaf          | 14,006                  | 8,737              | 12,817            | -               | -                 | -                   |
| Mesophyll     | -                       | -                  | -                 | 11,303          | -                 | -                   |
| Root          | 13,928                  | -                  | 60                | -               | -                 | -                   |
| Seedling      | 2,873                   | 2,621              | 21,819            | -               | -                 | -                   |
| Shoot         | 5,274                   | -                  | -                 | -               | -                 | -                   |
| Stem          | 21,521                  | -                  | -                 | -               | -                 | -                   |
| Xylem         | -                       | 16,106             | 6,920             | 8,538           | 8,870             | 7,431               |
| Others        | -                       | 149                | 959               | -               | -                 | -                   |
|               | 57,602                  | 28,949             | 42,575            | 19,841          | 8,870             | 7,431               |

| Assemblies results            |                         |                    |                   |                 |                   |                     |
|-------------------------------|-------------------------|--------------------|-------------------|-----------------|-------------------|---------------------|
| Tissue                        | <i>E. camaldulensis</i> | <i>E. globulus</i> | <i>E. grandis</i> | <i>E. gunni</i> | <i>E. pellita</i> | <i>E. urophylla</i> |
| Contigs                       | 8,519                   | 3,868              | 6,013             | 3,175           | 1,404             | 1,039               |
| Singlets                      | 8,150                   | 6,856              | 9,230             | 3,703           | 2,956             | 3,008               |
| Total assembled sequences     | 16,669                  | 10,724             | 15,243            | 6,878           | 4,360             | 4,047               |
| Annotated (Blastx NR)         | 11,880                  | 8,663              | 11,998            | 4,551           | 3,551             | 3,130               |
| Annotated (Blastx Swiss-prot) | 9,266                   | 6,934              | 9,324             | 3,590           | 2,819             | 2,473               |
| Annotated (Blastx TAIR)       | 11,314                  | 8,417              | 11,089            | 4,395           | 3,471             | 3,052               |
